# Supplementary material
Source: Research Square preprint supplement (doi:10.21203/rs.3.rs-9355215/v1)
Supplement: Supplementary file 1 [file 5c02b6afd34dd47f6933276a.docx]

**Selective conversion of organosolv lignin to p-coumaric acid by catalytic depolymerization using monometallic and bimetallic catalysts**

Thanchanok Preechakun1,2, Suchat Pongchaiphol2, Verawat chempreda2,3 Marisa Raita2,3*, Navadol Laosiripojana1,2,4

1The Joint Graduate School for Energy and Environment (JGSEE), King Mongkut’s University of Technology Thonburi, Prachauthit Road, Bangmod, Bangkok 10140, Thailand

2BIOTEC-JGSEE Integrative Biorefinery Laboratory, Innovation Cluster 2 Building, Thailand Science Park, Phaholyothin Road, Khlong Luang 12120, Pathumthani, Thailand

3Biorefinery and Bioproduct Technology Research Group, National Center for Genetic Engineering and Biotechnology, 113 Thailand Science Park, Pahonyothin Road, Khlong Luang, Pathum Thani 12120, Thailand

4The Academic of Science, The Royal Society of Thailand, Lak Si, Bangkok 10210, Thailand

*Corresponding author: E-mail: marisa.rai@biotec.or.th; Tel +66-2564-7000 (ext 3861)

**Table S1** Solubilities of lignin in different solvents. (Dissolve 2% (w/v) lignin in the solvent)

| **Solvent** | **Solubility (%)** |
| --- | --- |
| Methanol | 44.18 |
| DEE | 10.08 |
| Acetone | 71.49 |
| THF | 66.36 |
| Acetonitrile | 29.82 |
| Isopropanol | 11.45 |

**Figure S1** Comparison ofGC chromatograms of depolymerized products from fresh and spent Ni-Mo/Al2O3. The light grey referred standard p-coumaric acid at 0.2 mg/ml.
