# Supplementary material
Source: Research Square preprint supplement (doi:10.21203/rs.3.rs-9355215/v1)
Supplement: Supplementary file 2 [file cefa39f1231ff11fdb9145c8.docx]

**Highlight**

- Organosolv lignin from sugarcane bagasse was firstly converted into p-coumaric acid.
- Ni was selected as a main metal for bimetallic catalyst.
- Ni-Mo/Al2O3 had an excellent catalytic performance on lignin depolymerization.
- Recyclability test of Ni-Mo/Al2O3 was conducted for three cycles.
